# Supplementary material for: Impact of the Genetic Background on the Composition of the Chicken Plasma MiRNome in Response to a Stress
Source: PLoS One. 2014 Dec 4;9(12):e114598. doi: 10.1371/journal.pone.0114598 (PMC4256448; doi:10.1371/journal.pone.0114598)
Supplement: Table S5 — Cluster into functional groups of overrepresented GO terms identified in the Condition comparison. (XLSX) [file pone.0114598.s007.xlsx]

## Sheet: Feuil1
Annotation Cluster 1	Enrichment Score: 9.332364026771645
Database	GO Term	Genes	Count	%	Pvalue (FDR)
GOTERM_BP_FAT	GO:0045449: regulation of transcription	THRB, FST, CBX3, HOXD13, CNOT7, CBFB, CTNNB1, CITED2, GATA2, APP, SIN3B, FLI1, MYD88, RNF141, MIER1, GATA6, MDFIC, WWP1, GATA3, TARDBP, PHTF2, EED, CRY1, MLL3, CCNA2, TWIST1, PITX2, SATB2, MYO6, RCOR3, RREB1, TAF4B, EOMES, ARNTL, MED13, SIX4, PPARGC1A, PKIA, HIF1A, JUN, FOXG1, TFAP2B, MNX1, SMARCA5, TGIF1, SHOX, TFAP2A, ST18, EDA, SMARCA2, TSHZ3, CAMTA1, TSHZ2, TSHZ1, SOX5, ELK3, MYBL1, SOX9, LIN…	190	11.1962	1.89471e-12
GOTERM_BP_FAT	GO:0006355: regulation of transcription, DNA-dependent	THRB, FST, HOXD13, CNOT7, CBFB, CTNNB1, CITED2, GATA2, SIN3B, APP, FLI1, RNF141, MDFIC, GATA6, GATA3, MLL3, PITX2, SATB2, MYO6, TAF4B, EOMES, MED13, ARNTL, SIX4, PKIA, PPARGC1A, HIF1A, JUN, FOXG1, MNX1, SMARCA5, TFAP2B, SHOX, TFAP2A, TGIF1, ST18, TSHZ3, TSHZ2, TSHZ1, SOX5, ELK3, SOX9, LIN28B, MEIS1, ATF1, WT1, ATF2, MEIS2, HOXA3, ELK4, HOXA9, LHX8, RUNX2, TFDP1, BMP3, SMAD9, EHMT1, IKZF2, IKZF1, …	136	8.01414	3.7781e-07
GOTERM_BP_FAT	GO:0051252: regulation of RNA metabolic process	THRB, FST, HOXD13, CNOT7, CBFB, CTNNB1, CITED2, GATA2, SIN3B, APP, FLI1, RNF141, MDFIC, GATA6, GATA3, MLL3, PITX2, SATB2, MYO6, TAF4B, EOMES, MED13, ARNTL, SIX4, PKIA, PPARGC1A, HIF1A, JUN, FOXG1, MNX1, SMARCA5, TFAP2B, SHOX, TFAP2A, TGIF1, ST18, TSHZ3, TSHZ2, TSHZ1, SOX5, ELK3, SOX9, LIN28B, MEIS1, ATF1, WT1, ATF2, MEIS2, HOXA3, ELK4, HNRNPD, HOXA9, LHX8, RUNX2, TFDP1, BMP3, SMAD9, EHMT1, IKZF2,…	137	8.07307	3.87541e-07
GOTERM_BP_FAT	GO:0006350: transcription	PPARA, E2F5, THRB, PPARG, PAX6, HOXD13, CTCF, CBFA2T3, CNOT7, BZW1, GATA2, PAX9, MIER1, GATA6, GATA3, TARDBP, MED26, RTF1, PHTF2, EED, MYB, NFIL3, CRY1, NR2F2, KHDRBS1, SSBP3, RCOR3, RREB1, TAF4B, NCOA7, CCNC, ARNTL, ELL2, HIF1A, JUN, FOXG1, TGIF1, CLOCK, ZFP161, ING3, POLR2F, LCORL, ELL, BMPR2, NR3C2, CDC73, MYBL1, NR3C1, SOX9, DIDO1, ATF2, TSC22D1, NPAS2, HOXA3, CHD7, NR1D2, ZNF326, HAND2, TFEC…	88	5.18562	1.31842e-06
GOTERM_MF_FAT	GO:0030528: transcription regulator activity	THRB, HOXD13, CBX3, CNOT7, CBFB, CTNNB1, CITED2, GATA2, FLI1, MDFIC, GATA6, MED26, GATA3, TWIST1, PITX2, SATB2, TAF4B, EOMES, MED13, ARNTL, SIX4, PPARGC1A, ELL2, HIF1A, JUN, FOXG1, MNX1, SMARCA5, TFAP2B, SHOX, TFAP2A, TGIF1, ST18, CAMTA1, TSHZ3, TSHZ2, TSHZ1, ELL, SOX5, MYBL1, ELK3, SOX9, MEIS1, ATF1, WT1, ATF2, MEIS2, HOXA3, ELK4, ZNF326, TFEC, HOXA9, LHX8, RUNX2, TFDP1, SMAD9, IKZF2, IKZF1, SUB…	137	8.07307	1.00226e-05
GOTERM_MF_FAT	GO:0003677: DNA binding	LMO2, THRB, HOXD13, CTNNB1, CITED2, GATA2, APP, FLI1, RNF141, MIER1, MDFIC, GATA6, MED26, GATA3, TARDBP, MIER3, PHTF2, MLL3, PMS1, PITX2, ESCO1, SATB2, RCOR3, RREB1, TAF4B, EOMES, ARNTL, SIX4, PPARGC1A, HIF1A, JUN, FOXG1, MNX1, SMARCA5, TFAP2B, ZZZ3, SHOX, TFAP2A, TGIF1, ST18, SMARCA2, RAD23B, TSHZ3, HMGB1, TSHZ2, TSHZ1, SOX5, SOX4, ELK3, MYBL1, SOX9, LIN28B, MEIS1, ATF1, WT1, ATF2, MEIS2, HOXA3,…	170	10.0177	9.73701e-06
GOTERM_MF_FAT	GO:0003700: transcription factor activity	THRB, HOXD13, CITED2, CTNNB1, GATA2, FLI1, MDFIC, GATA6, GATA3, PITX2, SATB2, TAF4B, EOMES, SIX4, ARNTL, HIF1A, JUN, FOXG1, MNX1, TFAP2B, TFAP2A, SHOX, TGIF1, ST18, TSHZ3, TSHZ2, TSHZ1, SOX5, ELK3, SOX9, MEIS1, WT1, ATF1, ATF2, HOXA3, MEIS2, ELK4, HOXA9, LHX8, RUNX2, TFDP1, SMAD9, IKZF1, SMAD7, SMAD6, SMAD5, ESRRG, TEAD1, NR4A3, SMAD1, MAFK, ZFHX4, EBF3, ETS2, EBF1, RBPJ, ZFHX3, RERE, PPARA, FOXK…	103	6.06953	9.04046e-06
Annotation Cluster 2	Enrichment Score: 7.537978356271604
Database	GO Term	Genes	Count	%	Pvalue (FDR)
GOTERM_BP_FAT	GO:0006357: regulation of transcription from RNA polymerase II promoter	FOXK1, FST, PPARG, PAX6, HOXD13, CNOT7, CBFB, CTNNB1, CITED2, GATA2, APP, PAX9, MDFIC, GATA6, GATA3, NR2F2, FGF2, MYO6, OTX2, TLE4, SIX4, ARNTL, MED13, PKIA, PPARGC1A, HIF1A, JUN, TGIF1, SHOX, TFAP2A, CLOCK, SOX5, SOX9, WT1, MEIS2, POU2F3, POU2F1, FOXD1, BMP3, EHMT1, IKZF2, NTF3, IKZF1, JARID2, CREB1, SMAD5, IGF1, BRIP1, SMAD1, ID1, MAPK14, NEUROD1, PBX1, HIVEP1, NR5A2, HDAC9, ZFHX3, NFIA, NFIB	59	3.47672	1.4906e-06
GOTERM_BP_FAT	GO:0010557: positive regulation of macromolecule biosynthetic process	FOXK1, PPARG, PAX6, HOXD13, CNOT7, GLI3, CBFB, CTNNB1, CITED2, GATA2, APP, MYD88, PAX9, GATA6, GATA3, PDGFC, FGF2, CCNA2, MYO6, OTX2, SIX4, ARNTL, PPARGC1A, HIF1A, JUN, PDGFRA, SHOX, UBB, EIF5A2, CLOCK, ACVR1, ING5, SOX5, SOX9, WT1, IGF1R, MEIS2, ZNF326, POU2F3, POU2F1, TNKS, DYRK2, THBS1, FOXD1, BMP3, IKZF2, NTF3, IKZF1, CREB1, SMAD5, ESRRG, IGF1, SMAD1, EBF3, MAPK14, ETS2, EBF1, NEUROD1, PBX1, …	62	3.65351	1.91479e-06
GOTERM_BP_FAT	GO:0010604: positive regulation of macromolecule metabolic process	FOXK1, PPARG, PRKAG2, PAX6, HOXD13, CNOT7, GLI3, CBFB, CITED2, CTNNB1, GATA2, APP, MYD88, PAX9, GATA6, GATA3, PDGFC, FGF2, CCNA2, MYO6, OTX2, SIX4, ARNTL, PPARGC1A, ACVR2A, CCND1, HIF1A, JUN, PDGFRA, SHOX, UBB, EIF5A2, CLOCK, ACVR1, ING5, SOX5, KITLG, SOX9, WT1, IGF1R, MEIS2, ZNF326, BCL2, POU2F3, POU2F1, TNKS, DYRK2, THBS1, FOXD1, APC, PTPRC, BMP3, IKZF2, NTF3, IKZF1, CREB1, SMAD5, ESRRG, NDFIP2…	71	4.18385	1.97262e-06
GOTERM_BP_FAT	GO:0031328: positive regulation of cellular biosynthetic process	FOXK1, PPARG, PAX6, HOXD13, CNOT7, GLI3, CBFB, CTNNB1, CITED2, GATA2, APP, MYD88, PAX9, GATA6, GATA3, PDGFC, FGF2, CCNA2, MYO6, OTX2, SIX4, ARNTL, PPARGC1A, HIF1A, JUN, PDGFRA, SHOX, UBB, EIF5A2, CLOCK, ACVR1, ING5, SOX5, SOX9, WT1, IGF1R, MEIS2, ZNF326, POU2F3, POU2F1, TNKS, DYRK2, THBS1, FOXD1, BMP3, IKZF2, NTF3, IKZF1, CREB1, SMAD5, ESRRG, ARPP19, IGF1, SMAD1, EBF3, MAPK14, ETS2, EBF1, NEUROD1…	63	3.71243	2.14627e-06
GOTERM_BP_FAT	GO:0009891: positive regulation of biosynthetic process	FOXK1, PPARG, PAX6, HOXD13, CNOT7, GLI3, CBFB, CTNNB1, CITED2, GATA2, APP, MYD88, PAX9, GATA6, GATA3, PDGFC, FGF2, CCNA2, MYO6, OTX2, SIX4, ARNTL, PPARGC1A, HIF1A, JUN, PDGFRA, SHOX, UBB, EIF5A2, CLOCK, ACVR1, ING5, SOX5, SOX9, WT1, IGF1R, MEIS2, ZNF326, POU2F3, POU2F1, TNKS, DYRK2, THBS1, FOXD1, BMP3, IKZF2, NTF3, IKZF1, CREB1, SMAD5, ESRRG, ARPP19, IGF1, SMAD1, EBF3, MAPK14, ETS2, EBF1, NEUROD1…	63	3.71243	2.35464e-06
GOTERM_BP_FAT	GO:0045935: positive regulation of nucleobase, nucleoside, nucleotide and nucleic acid metabolic process	FOXK1, PPARG, PAX6, HOXD13, CNOT7, GLI3, CBFB, CTNNB1, CITED2, GATA2, APP, PAX9, GATA6, GATA3, PDGFC, FGF2, CCNA2, MYO6, OTX2, SIX4, ARNTL, PPARGC1A, HIF1A, JUN, PDGFRA, SHOX, UBB, CLOCK, ACVR1, ING5, SOX5, SOX9, WT1, IGF1R, MEIS2, ZNF326, POU2F3, POU2F1, TNKS, FOXD1, BMP3, PTPRC, IKZF2, NTF3, IKZF1, CREB1, SMAD5, ESRRG, IGF1, SMAD1, EBF3, MAPK14, ETS2, EBF1, NEUROD1, PBX1, NR5A2, NFIA, NFIB	59	3.47672	4.30461e-06
GOTERM_BP_FAT	GO:0051173: positive regulation of nitrogen compound metabolic process	FOXK1, PPARG, PAX6, HOXD13, CNOT7, GLI3, CBFB, CTNNB1, CITED2, GATA2, APP, PAX9, GATA6, GATA3, PDGFC, FGF2, CCNA2, MYO6, OTX2, SIX4, ARNTL, PPARGC1A, HIF1A, JUN, PDGFRA, SHOX, UBB, CLOCK, ACVR1, ING5, SOX5, SOX9, HPRT1, WT1, IGF1R, MEIS2, ZNF326, POU2F3, POU2F1, TNKS, FOXD1, BMP3, PTPRC, IKZF2, NTF3, IKZF1, CREB1, SMAD5, ESRRG, IGF1, SMAD1, EBF3, MAPK14, ETS2, EBF1, NEUROD1, PBX1, NR5A2, NFIA, NF…	60	3.53565	4.55781e-06
GOTERM_BP_FAT	GO:0045941: positive regulation of transcription	FOXK1, PPARG, PAX6, HOXD13, CNOT7, GLI3, CBFB, CTNNB1, CITED2, GATA2, APP, PAX9, GATA6, GATA3, FGF2, CCNA2, MYO6, OTX2, SIX4, ARNTL, PPARGC1A, HIF1A, JUN, SHOX, UBB, CLOCK, ACVR1, ING5, SOX5, SOX9, WT1, MEIS2, ZNF326, POU2F3, POU2F1, FOXD1, BMP3, IKZF2, NTF3, IKZF1, CREB1, SMAD5, ESRRG, IGF1, SMAD1, EBF3, ETS2, MAPK14, EBF1, NEUROD1, PBX1, NR5A2, NFIA, NFIB	54	3.18209	6.46172e-06
GOTERM_BP_FAT	GO:0045944: positive regulation of transcription from RNA polymerase II promoter	PPARG, PAX6, SOX5, HOXD13, SOX9, CNOT7, CBFB, WT1, CTNNB1, CITED2, GATA2, APP, MEIS2, PAX9, GATA6, GATA3, POU2F3, POU2F1, FGF2, FOXD1, BMP3, MYO6, IKZF2, IKZF1, NTF3, CREB1, OTX2, SMAD5, IGF1, SMAD1, SIX4, ARNTL, PPARGC1A, HIF1A, JUN, MAPK14, NEUROD1, SHOX, PBX1, NR5A2, CLOCK, NFIA, NFIB	43	2.53388	1.36533e-05
GOTERM_BP_FAT	GO:0010628: positive regulation of gene expression	FOXK1, PPARG, PAX6, HOXD13, CNOT7, GLI3, CBFB, CTNNB1, CITED2, GATA2, APP, PAX9, GATA6, GATA3, FGF2, CCNA2, MYO6, OTX2, SIX4, ARNTL, PPARGC1A, HIF1A, JUN, SHOX, UBB, CLOCK, ACVR1, ING5, SOX5, SOX9, WT1, MEIS2, ZNF326, POU2F3, POU2F1, FOXD1, BMP3, IKZF2, NTF3, IKZF1, CREB1, SMAD5, ESRRG, IGF1, SMAD1, EBF3, ETS2, MAPK14, EBF1, NEUROD1, PBX1, NR5A2, NFIA, NFIB	54	3.18209	1.58065e-05
GOTERM_BP_FAT	GO:0045893: positive regulation of transcription, DNA-dependent	FOXK1, PPARG, PAX6, SOX5, HOXD13, SOX9, CNOT7, CBFB, WT1, CTNNB1, CITED2, GATA2, APP, MEIS2, PAX9, GATA6, GATA3, POU2F3, POU2F1, FGF2, FOXD1, BMP3, MYO6, IKZF2, IKZF1, NTF3, CREB1, OTX2, SMAD5, ESRRG, IGF1, SMAD1, SIX4, ARNTL, PPARGC1A, HIF1A, ETS2, JUN, MAPK14, NEUROD1, SHOX, PBX1, NR5A2, CLOCK, NFIA, NFIB	46	2.71067	1.68768e-05
GOTERM_BP_FAT	GO:0051254: positive regulation of RNA metabolic process	FOXK1, PPARG, PAX6, SOX5, HOXD13, SOX9, CNOT7, CBFB, WT1, CTNNB1, CITED2, GATA2, APP, MEIS2, PAX9, GATA6, GATA3, POU2F3, POU2F1, FGF2, FOXD1, BMP3, MYO6, IKZF2, IKZF1, NTF3, CREB1, OTX2, SMAD5, ESRRG, IGF1, SMAD1, SIX4, ARNTL, PPARGC1A, HIF1A, ETS2, JUN, MAPK14, NEUROD1, SHOX, PBX1, NR5A2, CLOCK, NFIA, NFIB	46	2.71067	2.31389e-05
Annotation Cluster 3	Enrichment Score: 6.42159922587409
Database	GO Term	Genes	Count	%	Pvalue (FDR)
GOTERM_BP_FAT	GO:0000902: cell morphogenesis	NOG, PAX6, SOX9, HPRT1, TGFB2, EPHB2, CTNNB1, ALCAM, CDC42, APP, EZR, SLC1A3, ANK3, BCL2, NUMB, ROBO2, PAFAH1B1, B3GNT2, SEMA3A, APC, CSNK1A1, RAB8A, KIF3A, NTF3, CREB1, NFASC, PCDH15, EPHA7, HIF1A, MAPK14, FOXG1, TGFBR3, RELN, EFNA5, LAMC1, BMPR1B, MYH10	37	2.18032	1.20798e-06
GOTERM_BP_FAT	GO:0000904: cell morphogenesis involved in differentiation	NOG, PAX6, SOX9, HPRT1, TGFB2, EPHB2, CTNNB1, ALCAM, APP, SLC1A3, ANK3, BCL2, NUMB, ROBO2, PAFAH1B1, B3GNT2, SEMA3A, APC, NTF3, CREB1, NFASC, PCDH15, EPHA7, HIF1A, FOXG1, TGFBR3, EFNA5, RELN, LAMC1, BMPR1B, MYH10	31	1.82675	2.03562e-06
GOTERM_BP_FAT	GO:0032989: cellular component morphogenesis	NOG, PAX6, SOX9, HPRT1, TGFB2, EPHB2, CTNNB1, ACTG1, ALCAM, CDC42, APP, EZR, SLC1A3, ANK3, BCL2, NUMB, ROBO2, PAFAH1B1, B3GNT2, SEMA3A, APC, ACTB, CSNK1A1, RAB8A, ACTC1, KIF3A, NTF3, CREB1, NFASC, PCDH15, EPHA7, HIF1A, MAPK14, FOXG1, TGFBR3, RELN, EFNA5, LAMC1, BMPR1B, MYH10	39	2.29817	3.59468e-06
GOTERM_BP_FAT	GO:0032989: cellular component morphogenesis	NOG, PAX6, SOX9, HPRT1, TGFB2, EPHB2, CTNNB1, ACTG1, ALCAM, CDC42, APP, EZR, SLC1A3, ANK3, BCL2, NUMB, ROBO2, PAFAH1B1, B3GNT2, SEMA3A, APC, ACTB, CSNK1A1, RAB8A, ACTC1, KIF3A, NTF3, CREB1, NFASC, PCDH15, EPHA7, HIF1A, MAPK14, FOXG1, TGFBR3, RELN, EFNA5, LAMC1, BMPR1B, MYH10	40	3.29817	1
GOTERM_BP_FAT	GO:0030030: cell projection organization	PAX6, ARF6, RDX, HPRT1, TGFB2, VCL, EPHB2, ALCAM, CDC42, APP, ANK3, BCL2, NUMB, ROBO2, PAFAH1B1, B3GNT2, SEMA3A, APC, RAB8A, KIF3A, MYO6, NTF3, ROCK1, CREB1, MAP1B, NFASC, PCDH15, EPHA7, ITGA6, FOXG1, RELN, EFNA5, BMPR1B, MYH10	34	2.00354	2.39367e-05
GOTERM_BP_FAT	GO:0048858: cell projection morphogenesis	PAX6, HPRT1, EPHB2, TGFB2, ALCAM, APP, ANK3, BCL2, NUMB, ROBO2, PAFAH1B1, B3GNT2, SEMA3A, APC, RAB8A, KIF3A, NTF3, CREB1, NFASC, PCDH15, EPHA7, FOXG1, EFNA5, RELN, BMPR1B, MYH10	26	1.53212	2.66206e-05
GOTERM_BP_FAT	GO:0030182: neuron differentiation	PAX6, SOX5, RPE65, JAG1, HPRT1, GLI3, TGFB2, EPHB2, ALCAM, GATA2, APP, SLC1A3, ANK3, BCL2, NUMB, ROBO2, PAFAH1B1, B3GNT2, SEMA3A, LHX8, APC, RET, MYO6, NTF3, CREB1, MAP1B, OTX2, NFASC, PCDH15, EPHA7, NTRK2, VEGFA, FOXG1, MNX1, ID4, EFNA5, RELN, BMPR1B, PBX3, MYH10	40	2.3571	2.5716e-05
GOTERM_BP_FAT	GO:0048667: cell morphogenesis involved in neuron differentiation	PAX6, HPRT1, EPHB2, TGFB2, ALCAM, APP, SLC1A3, ANK3, BCL2, NUMB, ROBO2, PAFAH1B1, B3GNT2, SEMA3A, APC, NTF3, CREB1, NFASC, PCDH15, EPHA7, FOXG1, EFNA5, RELN, BMPR1B, MYH10	25	1.47319	4.96495e-05
GOTERM_BP_FAT	GO:0032990: cell part morphogenesis	PAX6, HPRT1, EPHB2, TGFB2, ALCAM, APP, ANK3, BCL2, NUMB, ROBO2, PAFAH1B1, B3GNT2, SEMA3A, APC, RAB8A, KIF3A, NTF3, CREB1, NFASC, PCDH15, EPHA7, FOXG1, EFNA5, RELN, BMPR1B, MYH10	26	1.53212	9.55901e-05
GOTERM_BP_FAT	GO:0048812: neuron projection morphogenesis	NTF3, CREB1, NFASC, PAX6, HPRT1, TGFB2, EPHB2, ALCAM, APP, EPHA7, ANK3, BCL2, FOXG1, NUMB, ROBO2, RELN, EFNA5, PAFAH1B1, SEMA3A, B3GNT2, BMPR1B, APC, MYH10	23	1.35533	0.000184141
GOTERM_BP_FAT	GO:0006928: cell motion	NRP2, PAX6, KITLG, CDH2, MYLIP, TGFB2, EPHB2, ALCAM, EDNRB, APP, CTGF, ANK3, SEMA3C, PAFAH1B1, ROBO2, B3GNT2, SEMA3A, NR2F2, APC, RET, NTF3, NFASC, SIX4, COL5A1, ELMO1, EPHA7, HIF1A, ITGA6, VEGFA, FOXG1, TGFBR3, LRP8, EFNA5, RELN, LAMC1, BMPR1B, SRGAP1, ACVR1, MYH10	39	2.29817	0.000187144
GOTERM_BP_FAT	GO:0031175: neuron projection development	PAX6, HPRT1, EPHB2, TGFB2, ALCAM, APP, ANK3, BCL2, NUMB, ROBO2, PAFAH1B1, B3GNT2, SEMA3A, APC, MYO6, NTF3, CREB1, MAP1B, NFASC, EPHA7, FOXG1, EFNA5, RELN, BMPR1B, MYH10	25	1.47319	0.000246119
GOTERM_BP_FAT	GO:0007409: axonogenesis	NTF3, CREB1, NFASC, PAX6, TGFB2, EPHB2, ALCAM, APP, EPHA7, ANK3, BCL2, FOXG1, NUMB, ROBO2, RELN, EFNA5, PAFAH1B1, SEMA3A, B3GNT2, BMPR1B, APC, MYH10	22	1.29641	0.000352958
GOTERM_BP_FAT	GO:0007411: axon guidance	NTF3, PAX6, NFASC, TGFB2, EPHB2, ALCAM, APP, EPHA7, ANK3, FOXG1, EFNA5, RELN, ROBO2, SEMA3A, B3GNT2, BMPR1B, MYH10	17	1.00177	0.000682774
Annotation Cluster 4	Enrichment Score: 5.175861703565025
Database	GO Term	Genes	Count	%	Pvalue (FDR)
GOTERM_BP_FAT	GO:0007423: sensory organ development	FGFR2, TWSG1, NOG, PAX6, SOBP, JAG1, GLI3, WT1, TGFB2, EPHB2, CTNNB1, SPRY2, CHD7, MEIS2, MDFIC, BCL2, POU2F1, APC, MYO6, IKZF1, OTX2, PCDH15, DLL1, SIX4, COL5A1, FZD6, SP3, NTRK2, VEGFA, FOXG1, NEUROD1, TGIF1, BMPR1B, MYH10	34	2.00354	2.64673e-05
GOTERM_BP_FAT	GO:0001654: eye development	TWSG1, IKZF1, OTX2, PAX6, GLI3, COL5A1, WT1, CTNNB1, TGFB2, EPHB2, CHD7, MEIS2, MDFIC, SP3, VEGFA, NTRK2, POU2F1, NEUROD1, TGIF1, BMPR1B, APC, MYH10	22	1.29641	0.000262503
GOTERM_BP_FAT	GO:0043010: camera-type eye development	TWSG1, IKZF1, PAX6, GLI3, WT1, CTNNB1, EPHB2, CHD7, MDFIC, SP3, VEGFA, POU2F1, NEUROD1, TGIF1, BMPR1B, MYH10, APC	17	1.00177	0.00815387
Annotation Cluster 5	Enrichment Score: 5.07959339889314
Database	GO Term	Genes	Count	%	Pvalue (FDR)
GOTERM_BP_FAT	GO:0006793: phosphorus metabolic process	NRBP1, PRPF4B, RPS6KB1, TTN, PRKX, TGFB2, MAP3K7, CSNK2A2, MAP3K5, APP, STK39, RET, BCR, PAN3, CSNK1G1, ROCK1, PTPRG, PIK3CD, WNK1, PPP1CB, PTPDC1, PTPRO, WEE1, MAP4K4, MAP4K5, BAZ1B, MAPK6, PDGFRA, ROR2, RELN, FGFR2, FGFR3, SSH1, ERBB4, BMPR2, DUSP10, STK17A, MST4, EPHB2, DUSP19, PTK2, LMTK2, TNKS, DYRK2, PTPN9, PTPN2, MET, PTPN14, TRIO, EPHA3, EPHA5, EPHA7, NTRK2, CDC42BPA, TGFBR3, ABL2, MYLK, …	108	6.36417	5.07787e-05
GOTERM_BP_FAT	GO:0006796: phosphate metabolic process	NRBP1, PRPF4B, RPS6KB1, TTN, PRKX, TGFB2, MAP3K7, CSNK2A2, MAP3K5, APP, STK39, RET, BCR, PAN3, CSNK1G1, ROCK1, PTPRG, PIK3CD, WNK1, PPP1CB, PTPDC1, PTPRO, WEE1, MAP4K4, MAP4K5, BAZ1B, MAPK6, PDGFRA, ROR2, RELN, FGFR2, FGFR3, SSH1, ERBB4, BMPR2, DUSP10, STK17A, MST4, EPHB2, DUSP19, PTK2, LMTK2, TNKS, DYRK2, PTPN9, PTPN2, MET, PTPN14, TRIO, EPHA3, EPHA5, EPHA7, NTRK2, CDC42BPA, TGFBR3, ABL2, MYLK, …	108	6.36417	5.07787e-05
GOTERM_BP_FAT	GO:0006468: protein amino acid phosphorylation	PRPF4B, NRBP1, NUAK1, RPS6KB1, TTN, PRKX, LATS2, TGFB2, MAP3K7, CSNK2A2, APP, MAP3K5, STK39, FGF2, SRPK2, SGK1, RET, PAN3, ADAM10, BCR, SGK3, ROCK1, CSNK1G1, WNK1, PRKCI, PRKCE, WEE1, PRKCB, MAP4K4, ACVR2A, MAP4K5, BAZ1B, MAPK6, PDGFRA, ROR2, RELN, MAP3K13, ACVR1, FGFR2, FGFR3, ERBB4, BMPR2, STK17A, MST4, EPHB2, IGF1R, PTK2, STK40, MAP3K2, BCL2, MAP3K1, LMTK2, CAMK2D, TNKS, PRKAA2, DYRK2, YES1, T…	83	4.89098	7.95748e-05
GOTERM_MF_FAT	GO:0004674: protein serine/threonine kinase activity	PRPF4B, NUAK1, RPS6KB1, TTN, LATS2, PRKX, CSNK2A2, MAP3K7, MAP3K5, STK39, SRPK2, SGK1, BCR, CSNK1G1, ROCK1, SGK3, PRKCI, WNK1, PRKCE, WEE1, PRKCB, ACVR2A, MAP4K4, MAP4K5, MAPK6, MAP3K13, ACVR1, BMPR2, STK17A, MST4, STK40, MAP3K2, MAP3K1, CAMK2D, LMTK2, DYRK2, PRKAA2, CAMK2A, CSNK1A1, NLK, RAF1, TRIO, RPS6KA5, RPS6KA6, ICK, CSNK1D, MAPK14, GSK3B, CDC42BPA, TGFBR3, BMPR1B, MYLK, BMPR1A	53	3.12316	0.00975285
GOTERM_MF_FAT	GO:0004672: protein kinase activity	NRBP1, PRPF4B, NUAK1, RPS6KB1, TTN, PRKX, LATS2, MAP3K7, CSNK2A2, MAP3K5, STK39, SRPK2, SGK1, RET, PAN3, BCR, SGK3, ROCK1, CSNK1G1, WNK1, PRKCI, PRKCE, WEE1, PRKCB, MAP4K4, ACVR2A, CCND1, MAP4K5, BAZ1B, MAPK6, PDGFRA, ROR2, RELN, MAP3K13, ACVR1, FGFR2, FGFR3, ERBB4, BMPR2, STK17A, MST4, EPHB2, IGF1R, PTK2, STK40, MAP3K2, MAP3K1, LMTK2, CAMK2D, PRKAA2, DYRK2, YES1, CAMK2A, CSNK1A1, NLK, MET, STRAD…	76	4.47849	0.00852207
GOTERM_BP_FAT	GO:0016310: phosphorylation	PRPF4B, NRBP1, NUAK1, TOLLIP, RPS6KB1, TTN, PRKX, LATS2, TGFB2, MAP3K7, CSNK2A2, APP, MAP3K5, STK39, FGF2, SRPK2, SGK1, RET, PAN3, ADAM10, BCR, SGK3, ROCK1, CSNK1G1, PIK3CD, WNK1, PRKCI, PRKCE, WEE1, PRKCB, MAP4K4, ACVR2A, ATP6V1A, MAP4K5, BAZ1B, MAPK6, PDGFRA, ROR2, RELN, MAP3K13, ACVR1, FGFR2, FGFR3, ERBB4, BMPR2, STK17A, MST4, EPHB2, IGF1R, PTK2, STK40, MAP3K2, BCL2, MAP3K1, LMTK2, CAMK2D, TNK…	86	5.06777	0.0040075
Annotation Cluster 6	Enrichment Score: 4.991304243089228
Database	GO Term	Genes	Count	%	Pvalue (FDR)
GOTERM_BP_FAT	GO:0007178: transmembrane receptor protein serine/threonine kinase signaling pathway	TWSG1, NOG, SMAD9, SMAD7, SMAD6, FST, SMAD5, BMPR2, SMAD1, TGFB2, MSX2, ACVR2A, ID1, JUN, COL1A2, TGFBR3, BMPR1B, TOB1, BMPR1A, ACVR1	20	1.17855	1.45903e-05
GOTERM_BP_FAT	GO:0030278: regulation of ossification	TWSG1, PTGER4, SMAD5, BMPR2, SMAD1, SOX9, CTNNB1, ACVR2A, WNT7B, BCL2, PBX1, BMPR1B, TOB2, TOB1, APC, BMPR1A, ACVR1	17	1.00177	2.65813e-05
GOTERM_BP_FAT	GO:0045667: regulation of osteoblast differentiation	ACVR2A, TWSG1, WNT7B, SMAD5, BMPR2, SMAD1, BMPR1B, CTNNB1, ACVR1, BMPR1A, APC, TOB1	12	0.70713	0.00248756
GOTERM_BP_FAT	GO:0045669: positive regulation of osteoblast differentiation	ACVR2A, WNT7B, SMAD5, BMPR2, SMAD1, BMPR1B, CTNNB1, ACVR1, BMPR1A	9	0.530348	0.0079075
GOTERM_MF_FAT	GO:0046332: SMAD binding	JUN, COL1A2, TGFBR3, SMAD1, BMPR1B, CTNNB1, ACVR1, BMPR1A, TOB1	9	0.530348	0.0160334
Annotation Cluster 7	Enrichment Score: 4.584952007011206
Database	GO Term	Genes	Count	%	Pvalue (FDR)
GOTERM_BP_FAT	GO:0016337: cell-cell adhesion	PCDHA6, PCDHA7, PCDHA8, PCDHA9, PCDHA2, PCDHA3, PCDH20, PCDHA4, PCDHA5, CLSTN1, CDH2, PCDHA1, SOX9, PCDHAC2, TGFB2, PCDHAC1, CTNNB1, VCAM1, CDH8, EZR, FAT3, CTGF, FAT4, BCL2, PCDHA11, PCDHA12, FNDC3A, PTPRC, RET, PCDH10, PCDH9, PCDH15, PCDH17, PCDH18, ROR2, BMPR1B, CDH10	36	2.12139	0.000402698
GOTERM_BP_FAT	GO:0022610: biological adhesion	PCDHA6, NRP2, PCDHA7, PCDHA8, PCDHA9, PCDHA2, PCDHA3, PCDHA4, PCDHA5, NELL2, CLSTN1, PCDHA1, VCL, TGFB2, CTNNB1, CD44, CTGF, RHOB, ROBO2, FNDC3A, RET, PCDH9, NRXN1, BTBD9, NCAM1, ROR2, RELN, VCAN, LAMC1, EDA, PCDH20, KITLG, CDH2, SOX9, PCDHAC2, PCDHAC1, CDH8, VCAM1, ALCAM, EZR, FAT3, FAT4, BCL2, PCDHA11, PCDHA12, THBS1, FN1, HAPLN1, PTPRC, PCDH10, NFASC, NLGN1, PCDH15, NID2, PCDH17, COL5A1, PCDH1…	60	3.53565	0.000490892
GOTERM_BP_FAT	GO:0007155: cell adhesion	PCDHA6, NRP2, PCDHA7, PCDHA8, PCDHA9, PCDHA2, PCDHA3, PCDHA4, PCDHA5, NELL2, CLSTN1, PCDHA1, VCL, TGFB2, CTNNB1, CD44, CTGF, RHOB, ROBO2, FNDC3A, RET, PCDH9, NRXN1, BTBD9, NCAM1, ROR2, RELN, VCAN, LAMC1, EDA, PCDH20, KITLG, CDH2, SOX9, PCDHAC2, PCDHAC1, CDH8, VCAM1, ALCAM, EZR, FAT3, FAT4, BCL2, PCDHA11, PCDHA12, THBS1, FN1, HAPLN1, PTPRC, PCDH10, NFASC, NLGN1, PCDH15, NID2, PCDH17, COL5A1, PCDH1…	60	3.53565	0.000490892
GOTERM_BP_FAT	GO:0007156: homophilic cell adhesion	PCDHA6, PCDHA7, PCDHA8, PCDHA9, PCDHA2, PCDHA3, PCDH20, PCDHA4, PCDHA5, CLSTN1, CDH2, PCDHA1, PCDHAC2, PCDHAC1, CDH8, FAT3, FAT4, PCDHA11, PCDHA12, RET, PCDH10, PCDH9, PCDH15, PCDH17, PCDH18, CDH10	25	1.47319	0.0232776
Annotation Cluster 8	Enrichment Score: 4.033016047797238
Database	GO Term	Genes	Count	%	Pvalue (FDR)
GOTERM_MF_FAT	GO:0008270: zinc ion binding	MKRN1, LMO2, THRB, LMO3, UTRN, RBM5, RNF216, REST, MYLIP, ZNRF3, LNX1, GATA2, BRPF1, RNF141, GATA6, MDFIC, GATA3, LONRF1, MLL3, LONRF2, RNF145, CARS, PHRF1, ZNF644, RREB1, YY1, UBR1, ZDBF2, SUZ12, TRIM37, TRIM36, TRIM33, RNF139, ZZZ3, ADAMTS1, RELN, PIAS1, ST18, ADAMTS3, ANKFY1, ADAMTS5, FBXO11, ZC3H3, TSHZ3, TSHZ2, TSHZ1, ADAMTSL3, RIMS2, LIN28B, TRIM71, RIMS1, ZNF618, DIDO1, WT1, ATF2, ZNF326, …	179	10.548	0.000224934
GOTERM_MF_FAT	GO:0046872: metal ion binding	SYT1, ATP1B1, NELL2, UTRN, RNF216, MYLIP, REST, ITSN1, ZNRF3, MAP3K7, ATP2B1, BRPF1, FSTL5, ZNF644, RREB1, YY1, UBR1, ZZZ3, ADAMTS1, PIAS1, ST18, ADAMTS3, ADD3, ADAMTS5, ADSS, PCDH20, RIMS2, KCNJ2, DIDO1, RIMS1, ZNF618, DMD, TNKS, LHX8, KLF5, ASXL2, PLAG1, MGAT4A, DNMT3A, IKZF2, IKZF1, SCD, KLF10, PCDH10, ESRRG, RYBP, ATP11A, PCDH15, ZNF521, PCDH17, PCDH18, PRPSAP2, ZFHX4, CBLB, ZNF217, ATP2A2, Z…	280	16.4997	0.00866708
GOTERM_MF_FAT	GO:0043167: ion binding	SYT1, ATP1B1, NELL2, UTRN, RNF216, MYLIP, REST, ITSN1, ZNRF3, ATP2B1, MAP3K7, BRPF1, FSTL5, ZNF644, RREB1, YY1, UBR1, ZZZ3, ADAMTS1, PIAS1, ST18, ADAMTS3, ADD3, ADAMTS5, ADSS, PCDH20, RIMS2, KCNJ2, DIDO1, RIMS1, ZNF618, DMD, TNKS, LHX8, KLF5, PLAG1, ASXL2, MGAT4A, DNMT3A, IKZF2, IKZF1, SCD, KLF10, PCDH10, ESRRG, RYBP, ATP11A, PCDH15, ZNF521, PCDH17, PCDH18, PRPSAP2, ZFHX4, CBLB, ZNF217, ATP2A2, Z…	283	16.6765	0.0123574
GOTERM_MF_FAT	GO:0043169: cation binding	SYT1, ATP1B1, NELL2, UTRN, RNF216, MYLIP, REST, ITSN1, ZNRF3, MAP3K7, ATP2B1, BRPF1, FSTL5, ZNF644, RREB1, YY1, UBR1, ZZZ3, ADAMTS1, PIAS1, ST18, ADAMTS3, ADD3, ADAMTS5, ADSS, PCDH20, RIMS2, KCNJ2, DIDO1, RIMS1, ZNF618, DMD, TNKS, LHX8, KLF5, ASXL2, PLAG1, MGAT4A, DNMT3A, IKZF2, IKZF1, SCD, KLF10, PCDH10, ESRRG, RYBP, ATP11A, PCDH15, ZNF521, PCDH17, PCDH18, PRPSAP2, ZFHX4, CBLB, ZNF217, ATP2A2, Z…	281	16.5586	0.0147866
GOTERM_MF_FAT	GO:0046914: transition metal ion binding	UTRN, RNF216, REST, MYLIP, ZNRF3, BRPF1, ZNF644, RREB1, YY1, UBR1, ZZZ3, ADAMTS1, PIAS1, ST18, ADAMTS3, ADAMTS5, RIMS2, RIMS1, DIDO1, ZNF618, DMD, TNKS, LHX8, ASXL2, PLAG1, KLF5, DNMT3A, IKZF2, IKZF1, KLF10, SCD, ESRRG, RYBP, ZNF521, CBLB, ZFHX4, ZNF217, ZFHX3, RERE, TLL1, SH3RF1, ZNF536, PPARA, PPARG, TMEM161B, SOBP, ZEB2, GLI3, ZBTB37, NR2F2, MBLAC2, ZCCHC11, ADAM10, ZDHHC7, MICAL3, ADNP, RNF17…	196	11.5498	0.0284549
Annotation Cluster 9	Enrichment Score: 3.8901217431689337
Database	GO Term	Genes	Count	%	Pvalue (FDR)
GOTERM_BP_FAT	GO:0010629: negative regulation of gene expression	FOXK1, ARID4A, FST, DICER1, PPARG, CBX3, ELK3, SOX9, CBFA2T2, GLI3, PDCD4, LIN28B, WT1, CTNNB1, CITED2, WWP2, MDFIC, WWP1, POU2F1, NR2F2, FOXD1, KHDRBS1, EHMT1, IKZF1, TBX3, JARID2, FZD1, NDFIP2, TLE4, PKIA, ID1, BNIP3L, YWHAQ, TGIF1, SHOX, HIVEP1, HDAC9, ZFHX3, EIF2C4	39	2.29817	6.8285e-05
GOTERM_BP_FAT	GO:0016481: negative regulation of transcription	FOXK1, ARID4A, FST, PPARG, CBX3, ELK3, SOX9, CBFA2T2, GLI3, PDCD4, WT1, CTNNB1, CITED2, MDFIC, WWP1, POU2F1, NR2F2, FOXD1, KHDRBS1, EHMT1, IKZF1, TBX3, JARID2, FZD1, TLE4, PKIA, ID1, YWHAQ, SHOX, TGIF1, HIVEP1, HDAC9, ZFHX3	33	1.94461	0.00117815
GOTERM_BP_FAT	GO:0010605: negative regulation of macromolecule metabolic process	CAV1, FOXK1, ARID4A, FST, DICER1, PPARG, CBX3, ELK3, SOX9, CBFA2T2, GLI3, PDCD4, LIN28B, WT1, CTNNB1, CITED2, WWP2, MDFIC, WWP1, POU2F1, THBS1, NR2F2, FOXD1, KHDRBS1, PTPRC, EHMT1, IKZF1, TBX3, JARID2, FZD1, NDFIP2, TLE4, PKIA, ID1, JUN, BNIP3L, YWHAQ, TGIF1, SHOX, HIVEP1, HDAC9, ZFHX3, IGFBP5, EIF2C4	44	2.59281	0.00321843
GOTERM_MF_FAT	GO:0016564: transcription repressor activity	KHDRBS1, FOXK1, IKZF1, TBX3, ARID4A, JARID2, PPARG, RUNX1T1, CBX3, TLE4, ELK3, CBFA2T2, CITED2, ID1, MDFIC, BCL11A, TGIF1, HIVEP1, HDAC9, ZFHX3, TOB1	21	1.23748	0.00759905
GOTERM_BP_FAT	GO:0045892: negative regulation of transcription, DNA-dependent	ARID4A, FOXK1, PPARG, FST, SOX9, CBFA2T2, WT1, CTNNB1, CITED2, MDFIC, NR2F2, FOXD1, EHMT1, IKZF1, TBX3, JARID2, TLE4, PKIA, ID1, YWHAQ, SHOX, TGIF1, HIVEP1, HDAC9, ZFHX3	25	1.47319	0.00767562
GOTERM_BP_FAT	GO:0051172: negative regulation of nitrogen compound metabolic process	CAV1, FOXK1, ARID4A, FST, PPARG, CBX3, ELK3, SOX9, CBFA2T2, GLI3, PDCD4, WT1, CTNNB1, CITED2, MDFIC, WWP1, POU2F1, NR2F2, FOXD1, KHDRBS1, EHMT1, IKZF1, TBX3, JARID2, FZD1, TLE4, PKIA, ID1, YWHAQ, SHOX, TGIF1, HIVEP1, HDAC9, ZFHX3	34	2.00354	0.00910297
GOTERM_BP_FAT	GO:0031327: negative regulation of cellular biosynthetic process	CAV1, FOXK1, ARID4A, FST, PPARG, CBX3, ELK3, SOX9, CBFA2T2, GLI3, PDCD4, WT1, CTNNB1, CITED2, MDFIC, WWP1, POU2F1, NR2F2, FOXD1, KHDRBS1, EHMT1, IKZF1, TBX3, JARID2, FZD1, TLE4, PKIA, ID1, YWHAQ, TGIF1, SHOX, HIVEP1, HDAC9, ZFHX3, IGFBP5, EIF2C4	36	2.12139	0.00967166
GOTERM_BP_FAT	GO:0010558: negative regulation of macromolecule biosynthetic process	FOXK1, ARID4A, FST, PPARG, CBX3, ELK3, SOX9, CBFA2T2, GLI3, PDCD4, WT1, CTNNB1, CITED2, MDFIC, WWP1, POU2F1, NR2F2, FOXD1, KHDRBS1, EHMT1, IKZF1, TBX3, JARID2, FZD1, TLE4, PKIA, ID1, YWHAQ, TGIF1, SHOX, HIVEP1, HDAC9, ZFHX3, IGFBP5, EIF2C4	35	2.06246	0.0103297
GOTERM_BP_FAT	GO:0000122: negative regulation of transcription from RNA polymerase II promoter	EHMT1, IKZF1, JARID2, FST, PPARG, TLE4, PKIA, WT1, CTNNB1, CITED2, ID1, MDFIC, SHOX, TGIF1, HIVEP1, NR2F2, HDAC9, FOXD1, ZFHX3	19	1.11962	0.0106481
GOTERM_BP_FAT	GO:0051253: negative regulation of RNA metabolic process	ARID4A, FOXK1, PPARG, FST, SOX9, CBFA2T2, WT1, CTNNB1, CITED2, MDFIC, NR2F2, FOXD1, EHMT1, IKZF1, TBX3, JARID2, TLE4, PKIA, ID1, YWHAQ, SHOX, TGIF1, HIVEP1, HDAC9, ZFHX3	25	1.47319	0.0113701
GOTERM_BP_FAT	GO:0009890: negative regulation of biosynthetic process	CAV1, FOXK1, ARID4A, FST, PPARG, CBX3, ELK3, SOX9, CBFA2T2, GLI3, PDCD4, WT1, CTNNB1, CITED2, MDFIC, WWP1, POU2F1, NR2F2, FOXD1, KHDRBS1, EHMT1, IKZF1, TBX3, JARID2, FZD1, TLE4, PKIA, ID1, YWHAQ, TGIF1, SHOX, HIVEP1, HDAC9, ZFHX3, IGFBP5, EIF2C4	36	2.12139	0.0133653
GOTERM_BP_FAT	GO:0045934: negative regulation of nucleobase, nucleoside, nucleotide and nucleic acid metabolic process	FOXK1, ARID4A, FST, PPARG, CBX3, ELK3, SOX9, CBFA2T2, GLI3, PDCD4, WT1, CTNNB1, CITED2, MDFIC, WWP1, POU2F1, NR2F2, FOXD1, KHDRBS1, EHMT1, IKZF1, TBX3, JARID2, FZD1, TLE4, PKIA, ID1, YWHAQ, SHOX, TGIF1, HIVEP1, HDAC9, ZFHX3	33	1.94461	0.0133653
Annotation Cluster 10	Enrichment Score: 3.8792034863101823
Database	GO Term	Genes	Count	%	Pvalue (FDR)
GOTERM_BP_FAT	GO:0001568: blood vessel development	FGFR2, FGF18, CAV1, DICER1, CDH2, ELK3, WT1, CTNNB1, CITED2, TGFB2, HOXA3, CHD7, CTGF, SEMA3C, QKI, NR2F2, THBS1, FGF2, NCL, COL5A1, HIF1A, MAPK14, VEGFA, NTRK2, COL1A2, TGFBR3, ACVR1	27	1.59104	0.0033141
GOTERM_BP_FAT	GO:0001944: vasculature development	FGFR2, FGF18, CAV1, DICER1, CDH2, ELK3, WT1, CTNNB1, CITED2, TGFB2, HOXA3, CHD7, CTGF, SEMA3C, QKI, NR2F2, THBS1, FGF2, NCL, COL5A1, HIF1A, MAPK14, VEGFA, NTRK2, COL1A2, TGFBR3, ACVR1	27	1.59104	0.0061661
GOTERM_BP_FAT	GO:0048514: blood vessel morphogenesis	FGFR2, FGF18, CAV1, DICER1, ELK3, CDH2, NCL, WT1, CTNNB1, TGFB2, CITED2, HIF1A, HOXA3, CTGF, MAPK14, VEGFA, NTRK2, SEMA3C, QKI, THBS1, NR2F2, FGF2, ACVR1	23	1.35533	0.00664539
Annotation Cluster 11	Enrichment Score: 3.8350939782895788
Database	GO Term	Genes	Count	%	Pvalue (FDR)
GOTERM_BP_FAT	GO:0035295: tube development	FGFR2, FGF18, NOG, DICER1, BMPR2, HOXD13, GLI3, CTNNB1, RGMA, SPRY2, CD44, CTGF, GATA6, MDFIC, BCL2, FGF2, RET, IGF1, FZD6, HIF1A, SALL1, SP3, VEGFA, PDGFRA, TGIF1, TFAP2A, PTCH1, PBX1, NFIB, BMPR1A, ACVR1	31	1.82675	0.000892616
GOTERM_BP_FAT	GO:0060541: respiratory system development	FGFR2, FGF18, DICER1, BMPR2, GLI3, CTNNB1, SPRY2, CHD7, MDFIC, GATA6, CTGF, SP3, VEGFA, POU2F1, PDGFRA, FGF2, BMPR1A, NFIB	18	1.0607	0.00582093
GOTERM_BP_FAT	GO:0030324: lung development	FGFR2, FGF18, DICER1, BMPR2, GLI3, CTNNB1, SPRY2, MDFIC, GATA6, CTGF, SP3, VEGFA, PDGFRA, FGF2, BMPR1A, NFIB	16	0.94284	0.0112536
GOTERM_BP_FAT	GO:0030323: respiratory tube development	FGFR2, FGF18, DICER1, BMPR2, GLI3, CTNNB1, SPRY2, MDFIC, GATA6, CTGF, SP3, VEGFA, PDGFRA, FGF2, BMPR1A, NFIB	16	0.94284	0.0139931
Annotation Cluster 12	Enrichment Score: 3.6161312449549508
Database	GO Term	Genes	Count	%	Pvalue (FDR)
GOTERM_BP_FAT	GO:0030334: regulation of cell migration	ADAM10, PAX6, IGF1, PTEN, CITED2, VCL, IGF1R, HIF1A, PTP4A1, RRAS2, BCL2, VEGFA, PDGFRA, TGFBR3, UNC5C, THBS1, FGF2, IGFBP5, APC	19	1.11962	0.00324789
GOTERM_BP_FAT	GO:0051270: regulation of cell motion	ADAM10, PAX6, IGF1, PTEN, CITED2, VCL, IGF1R, HIF1A, PTP4A1, RRAS2, BCL2, VEGFA, PDGFRA, TGFBR3, UNC5C, SEMA3A, THBS1, FGF2, IGFBP5, APC	20	1.17855	0.00914017
GOTERM_BP_FAT	GO:0030335: positive regulation of cell migration	IGF1R, ADAM10, HIF1A, BCL2, RRAS2, PTP4A1, VEGFA, PDGFRA, IGF1, THBS1, FGF2, APC	12	0.70713	0.00995297
GOTERM_BP_FAT	GO:0040012: regulation of locomotion	ADAM10, PAX6, IGF1, PTEN, CITED2, VCL, IGF1R, HIF1A, PTP4A1, RRAS2, BCL2, VEGFA, PDGFRA, TGFBR3, UNC5C, THBS1, FGF2, IGFBP5, APC	19	1.11962	0.0153221
Annotation Cluster 13	Enrichment Score: 3.5454384051542323
Database	GO Term	Genes	Count	%	Pvalue (FDR)
GOTERM_BP_FAT	GO:0048598: embryonic morphogenesis	FGFR2, TWSG1, NOG, DICER1, BMPR2, SOBP, HOXD13, GLI3, CTNNB1, MSX2, RGMA, SPRY2, PGP, HOXA3, CHD7, POU2F1, HOXA9, ODZ4, RET, MYO6, TBX3, OTX2, PCDH15, SMAD1, SIX4, FZD6, ACVR2A, SP3, PRKAR1A, FOXG1, NEUROD1, TFAP2A, TGIF1, ROR2, SHOX, PBX1, PTCH1, ACVR1, BMPR1A	39	2.29817	0.000791555
GOTERM_BP_FAT	GO:0003002: regionalization	NOG, BMPR2, PAX6, HOXD13, GLI3, CTNNB1, HOXA3, HOXA9, NR2F2, APC, KIF3A, TBX3, OTX2, DLL1, ACVR2A, SFRP2, FOXG1, MNX1, TGIF1, ROR2, NEUROD1, PTCH1, RELN, PBX1, BMPR1B, BMPR1A	26	1.53212	0.0166357
GOTERM_BP_FAT	GO:0009953: dorsal/ventral pattern formation	NOG, KIF3A, OTX2, PAX6, GLI3, CTNNB1, FOXG1, MNX1, TGIF1, PTCH1, BMPR1B, APC, BMPR1A	13	0.766058	0.0211459
GOTERM_BP_FAT	GO:0007389: pattern specification process	NOG, FST, BMPR2, PAX6, HOXD13, GLI3, CTNNB1, CITED2, HOXA3, SOSTDC1, HOXA9, NR2F2, APC, KIF3A, TBX3, OTX2, DLL1, ACVR2A, SFRP2, VEGFA, FOXG1, MNX1, NEUROD1, TGIF1, ROR2, PTCH1, RELN, PBX1, BMPR1B, BMPR1A, ACVR1	31	1.82675	0.0244542
Annotation Cluster 14	Enrichment Score: 3.454872319928499
Database	GO Term	Genes	Count	%	Pvalue (FDR)
GOTERM_BP_FAT	GO:0051056: regulation of small GTPase mediated signal transduction	RABGAP1, TBC1D8, KITLG, SHOC2, RASGEF1A, ARF6, ITSN1, RGL1, TBC1D15, TIAM2, EVI5, SOS2, RAPGEF4, PAFAH1B1, RASA3, RAPGEF2, FGD6, RASA1, IQSEC1, FBXO8, RASA2, NET1, ARHGEF3, DAB2IP, BCR, ARHGEF6, IGF1, TRIO, ARHGEF12, FARP1, TBC1D23, PSD, RELN	33	1.94461	0.00608725
GOTERM_MF_FAT	GO:0060589: nucleoside-triphosphatase regulator activity	GRPEL2, RALGPS2, RABGAP1, TBC1D8, RASGEF1A, RIMS2, ITSN1, RIMS1, RGL1, TBC1D15, EVI5, TIAM2, SOS2, RAPGEF4, DOCK10, RASA3, RAPGEF2, FGD6, FBXO8, RASA1, IQSEC1, RASA2, NET1, ARHGEF3, DAB2IP, BCR, ARHGEF6, NF1, TRIO, DOCK7, ARHGEF12, DOCK3, FARP1, MAP4K4, MAP4K5, TBC1D23, PSD, JUN, CDC42BPA, SRGAP1	40	2.3571	0.0193587
GOTERM_MF_FAT	GO:0030695: GTPase regulator activity	RALGPS2, RABGAP1, TBC1D8, RASGEF1A, RIMS2, ITSN1, RIMS1, RGL1, TBC1D15, EVI5, TIAM2, SOS2, RAPGEF4, DOCK10, RASA3, RAPGEF2, FGD6, FBXO8, RASA1, IQSEC1, RASA2, NET1, ARHGEF3, DAB2IP, BCR, ARHGEF6, NF1, TRIO, DOCK7, ARHGEF12, DOCK3, FARP1, MAP4K4, MAP4K5, TBC1D23, PSD, JUN, CDC42BPA, SRGAP1	39	2.29817	0.0195154
GOTERM_MF_FAT	GO:0005085: guanyl-nucleotide exchange factor activity	ARHGEF3, RALGPS2, BCR, ARHGEF6, TRIO, RASGEF1A, DOCK7, ITSN1, ARHGEF12, FARP1, DOCK3, RGL1, PSD, TIAM2, SOS2, RAPGEF4, RAPGEF2, DOCK10, FGD6, IQSEC1, FBXO8, NET1	22	1.29641	0.019781
Annotation Cluster 15	Enrichment Score: 3.1640489959069478
Database	GO Term	Genes	Count	%	Pvalue (FDR)
GOTERM_BP_FAT	GO:0009792: embryonic development ending in birth or egg hatching	FGFR2, NOG, ELL, PAX6, GLI3, TPM1, CITED2, RPA1, RGMA, GATA2, HOXA3, CHD7, GATA6, HOXA9, MYB, FOXD1, KIF3A, ADAM10, DLL1, SIX4, FZD6, ACVR2A, HIF1A, SFRP2, SP3, MNX1, PDGFRA, TGFBR3, TGIF1, ROR2, SHOX, TFAP2A, PBX1, PTCH1, ACVR1, MYH10	36	2.12139	0.0182407
GOTERM_BP_FAT	GO:0043009: chordate embryonic development	FGFR2, NOG, ELL, PAX6, GLI3, TPM1, CITED2, RPA1, RGMA, GATA2, HOXA3, CHD7, GATA6, HOXA9, MYB, FOXD1, KIF3A, ADAM10, DLL1, SIX4, FZD6, ACVR2A, HIF1A, SFRP2, SP3, MNX1, PDGFRA, TGFBR3, TGIF1, ROR2, SHOX, TFAP2A, PBX1, PTCH1, ACVR1, MYH10	36	2.12139	0.0182407
GOTERM_BP_FAT	GO:0048568: embryonic organ development	FGFR2, NOG, SOBP, GLI3, CITED2, SPRY2, GATA2, CHD7, HOXA3, MYB, FOXD1, MYO6, OTX2, PCDH15, SIX4, FZD6, HIF1A, SP3, FOXG1, VEGFA, SHOX, ROR2, TFAP2A, NEUROD1, PBX1	25	1.47319	0.0204799
